# Supplementary material
Source: ML conference proceedings conference paper supplement (https://www.ecva.net/papers/eccv_2020/papers_ECCV/html/123580477_ECCV_2020_paper.php)
Supplement: Supplementary file 2 [file 123580477-supp.zip]

| Module                                                                   | Details                                                                                                                                            |
|--------------------------------------------------------------------------|----------------------------------------------------------------------------------------------------------------------------------------------------|
| Embedding ( $\hat{f} \rightarrow \bar{f}$ )                              | $\begin{bmatrix} \text{conv}1 \times 1 \\ \text{BN} \\ \text{ReLU} \\ \text{Dropout} \end{bmatrix} \times 3$                                       |
| Embedding ( $\hat{\mathcal{P}} \rightarrow \bar{\mathcal{P}}$ )          | $\begin{bmatrix} \text{conv}1 \times 1 \\ \text{ReLU} \end{bmatrix} \times 3$                                                                      |
| Spatial attention mask ( $\bar{\mathcal{P}} \rightarrow \mathcal{P}^n$ ) | $\begin{bmatrix} \text{conv}1 \times 1, 256 \\ \text{ReLU} \\ \text{conv}1 \times 1, 128 \\ \text{ReLU} \\ \text{conv}1 \times 1, 1 \end{bmatrix}$ |

Table 1: Building blocks of our SAPNet. We use  $\text{conv}1 \times 1$  to enable efficient computations.
