# Supplementary material
Source: ML conference proceedings conference paper supplement (https://www.ecva.net/papers/eccv_2020/papers_ECCV/html/123580477_ECCV_2020_paper.php)
Supplement: Supplementary file 3 [file 123580477-supp.zip]

Archive with 10 entries (10 files):
-  building_blocks.tex
- __MACOSX/._ building_blocks.tex
-  building_blocks.pdf
- __MACOSX/._ building_blocks.pdf
- detection_results.pdf
- __MACOSX/._detection_results.pdf
- instance_seg_results.pdf
- __MACOSX/._instance_seg_results.pdf
- segmentation_results.pdf
- __MACOSX/._segmentation_results.pdf
