# Supplementary material
Source: ML conference proceedings conference paper supplement (https://www.ecva.net/papers/eccv_2020/papers_ECCV/html/123580477_ECCV_2020_paper.php)
Supplement: Supplementary file 3 [file 123580477-supp.zip › building_blocks.tex]

\documentclass{article}
\usepackage{booktabs}

\usepackage{times}
\usepackage{epsfig}
\usepackage{graphicx}
\usepackage{amsmath}
\usepackage{amssymb}
\usepackage{tabulary}
\usepackage{multirow}

\usepackage{soul}

% Include other packages here, before hyperref.

\usepackage[british,UKenglish,USenglish,english,american]{babel}


\newcommand{\ve}[1]{\mathbf{#1}} % for displaying a vector
\newcommand{\ma}[1]{\mathrm{#1}} % for displaying a matrix

\newcommand{\tabincell}[2]{\begin{tabular}{@{}#1@{}}#2\end{tabular}}

\renewcommand\arraystretch{1.2}

\def\httilde{\mbox{\tt\raisebox{-.5ex}{\symbol{126}}}}


\begin{document}


\newcommand{\blocka}[2]{\multirow{3}{*}{\(\left[\begin{array}{c}\text{conv1$\times$1}\\[-.1em] \text{ReLU} \end{array}\right]\)$\times$#2}
}
\newcommand{\blockb}[3]{\multirow{3}{*}{\(\left[\begin{array}{c}\text{conv1$\times$1}\\[-.1em] \text{BN}\\[-.1em] \text{ReLU}\\[-.1em] \text{Dropout}\end{array}\right]\)$\times$#3}
}
\newcommand{\blockc}[2]{\multirow{3}{*}{\(\left[\begin{array}{c}\text{conv1$\times$1, 256}\\[-.1em] \text{ReLU}\\[-.1em] \text{conv1$\times$1, 128}\\[-.1em] \text{ReLU}\\[-.1em] \text{conv1$\times$1, 1} \end{array}\right]\)}
}

\renewcommand\arraystretch{1.1}
\setlength{\tabcolsep}{3pt}
\begin{table*}[t]
\begin{center}
\resizebox{1.0\linewidth}{!}{
%\footnotesize
\begin{tabular}{c|c|c}
\hline
 Module & Details \\

\hline

 &  & \\
\multirow{4}{*}{Embedding ($\hat{f} \to \bar{f}$)}   & \blockb{512}{128}{3}\\
 &  & \\
 &  & \\
 &  & \\
 &  & \\
 \hline
 \multirow{3}{*}{Embedding ($\mathcal{\hat{P}} \to \mathcal{\bar{P}}$)} & \blocka{512}{3}\\
 &  & \\
 &  & \\
 \hline
 &  & \\
 \multirow{5}{*}{Spatial attention mask ($\mathcal{\bar{P}} \to \mathcal{P}^n$)} & \blockc{512}{3}\\
 &  & \\
 &  & \\
 &  & \\
  &  & \\
   &  & \\
\hline
\end{tabular}
}
\end{center}
\vspace{-.5em}
\caption{Building blocks of the proposed SAPNet. We use conv1$\times$1 to enable efficient computations.}
\label{tab:arch}
\vspace{-.5em}
\end{table*}


\end{document}
