# Supplementary material
Source: ML conference proceedings conference paper supplement (https://www.ecva.net/papers/eccv_2020/papers_ECCV/html/123580477_ECCV_2020_paper.php)

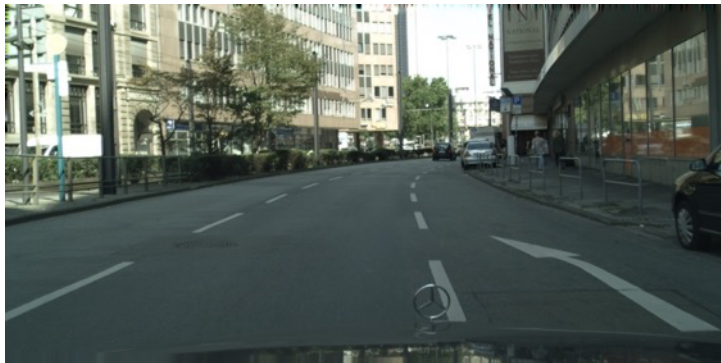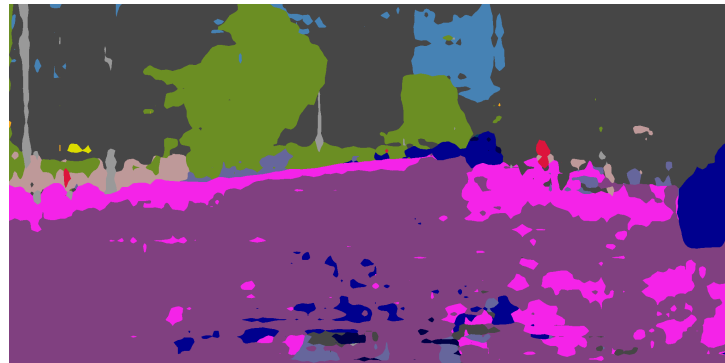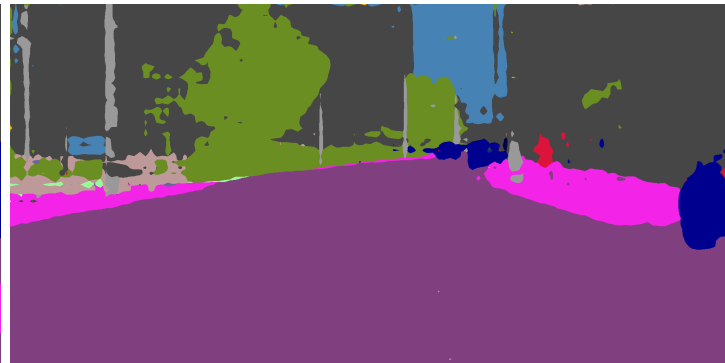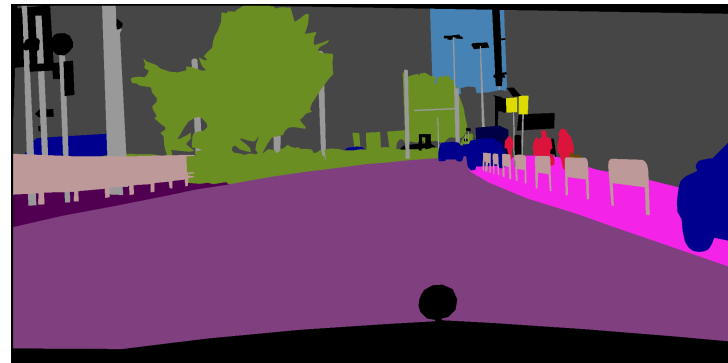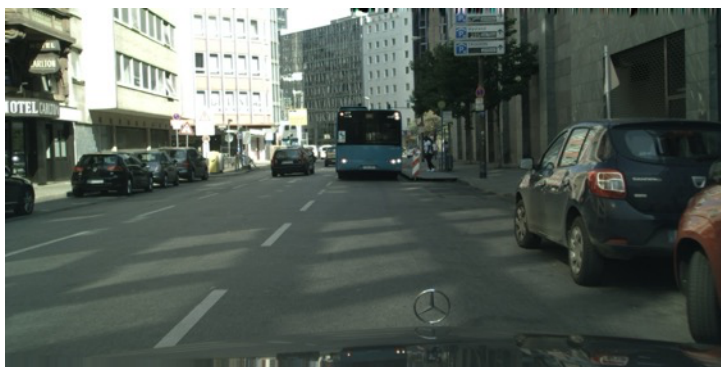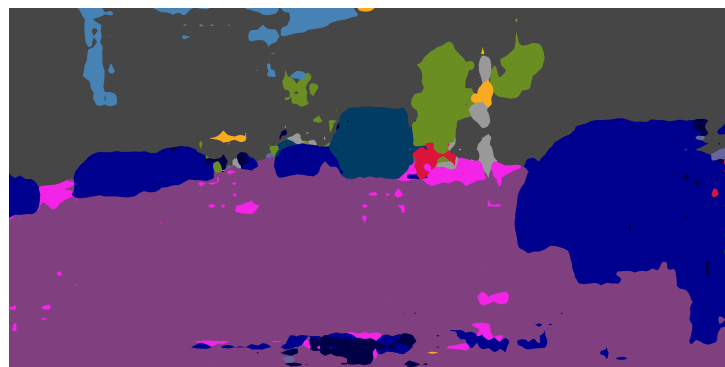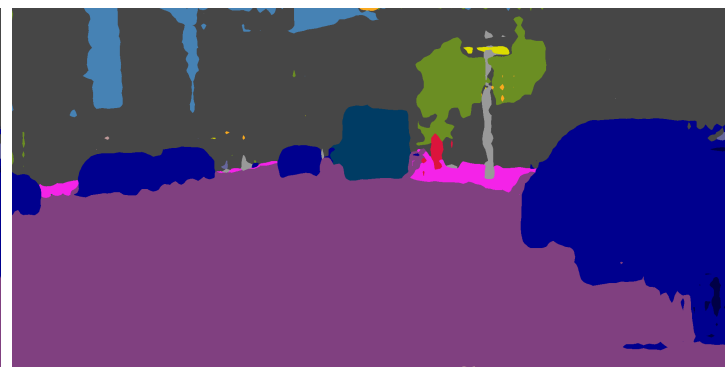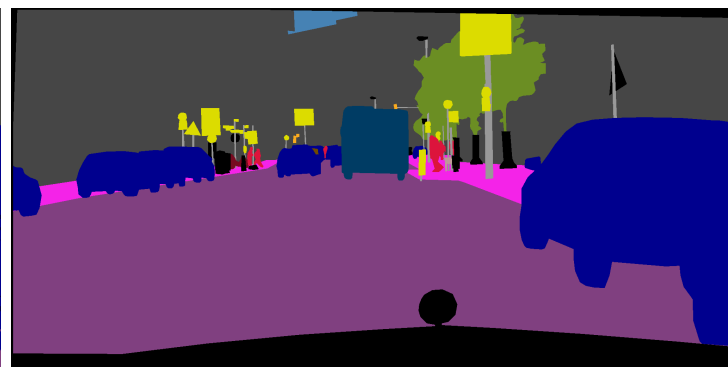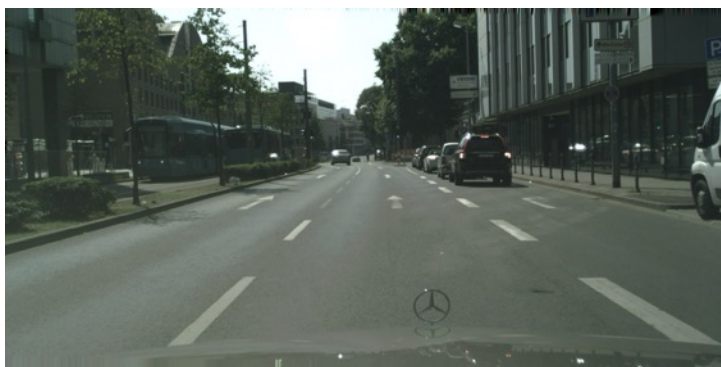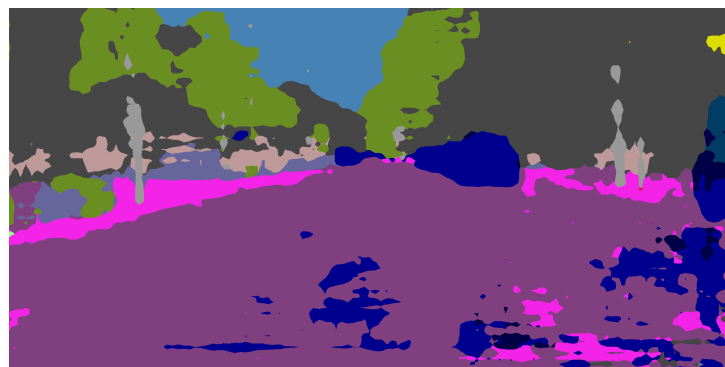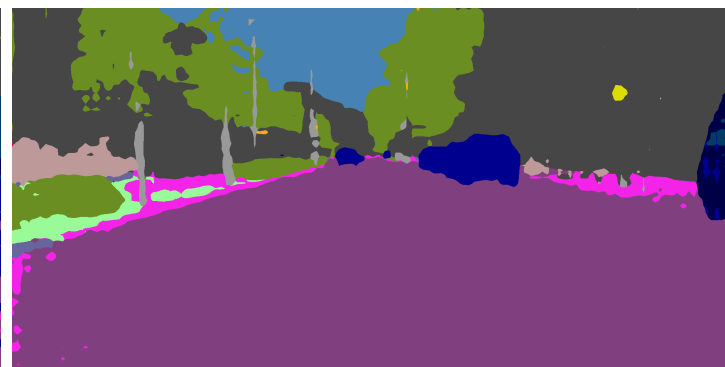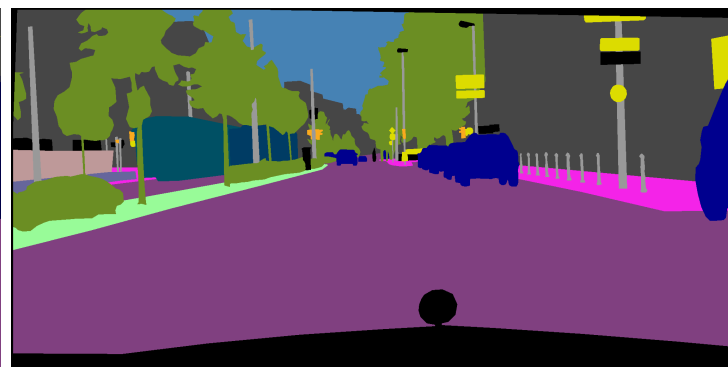

Target Image

Non-adapted

Adapted (Ours)

Ground-Truth

Supplement: Supplementary file 1 [file 123580477-supp.zip]

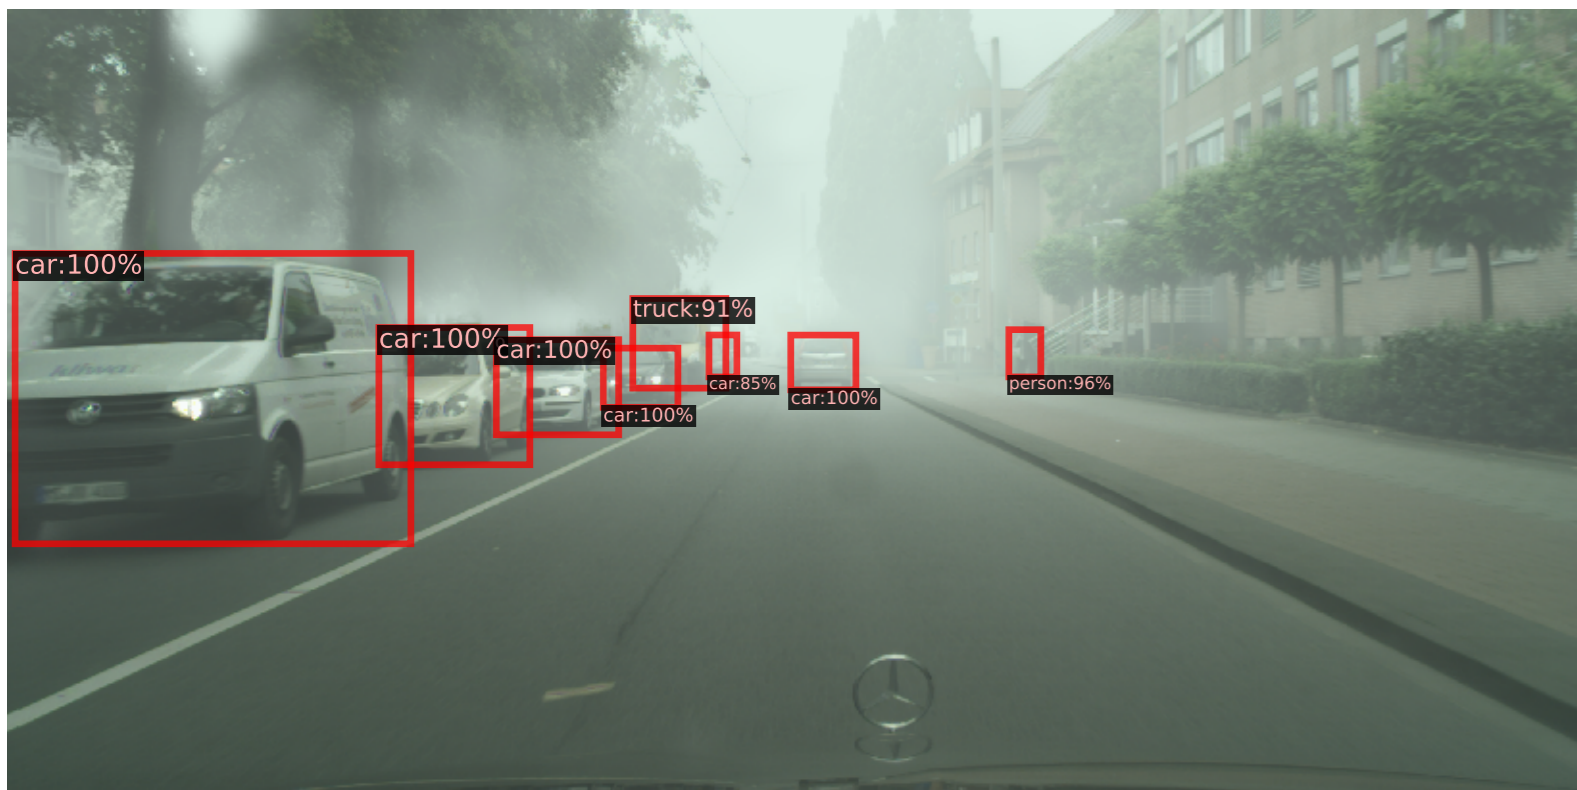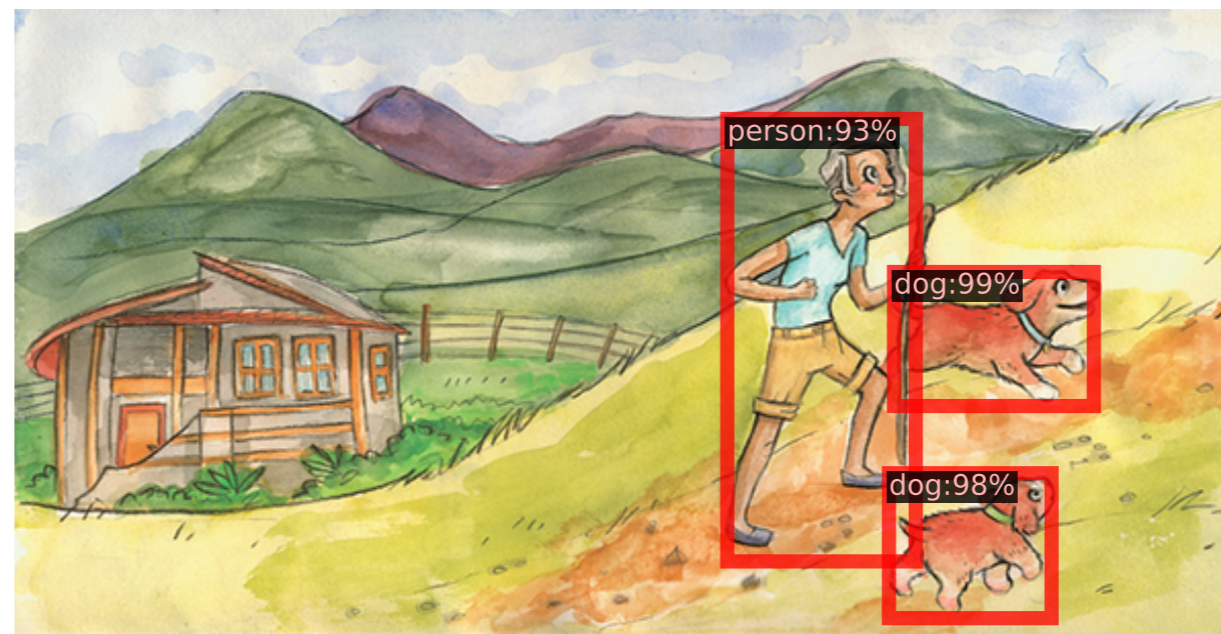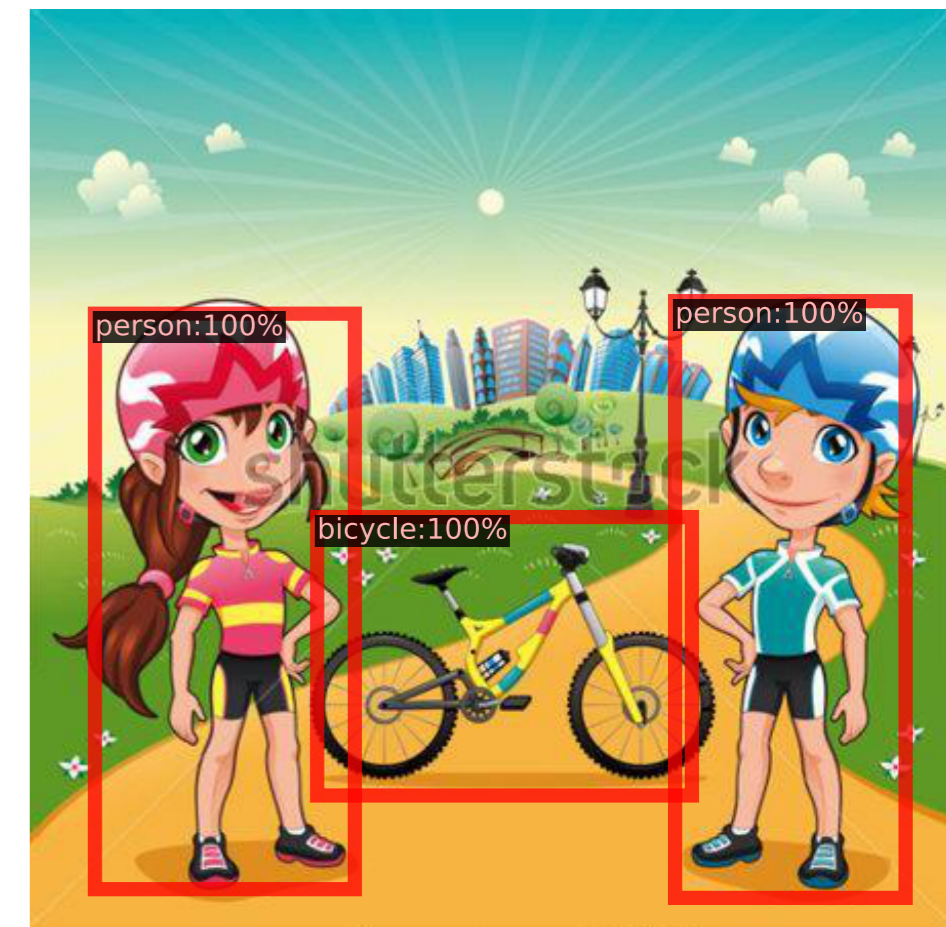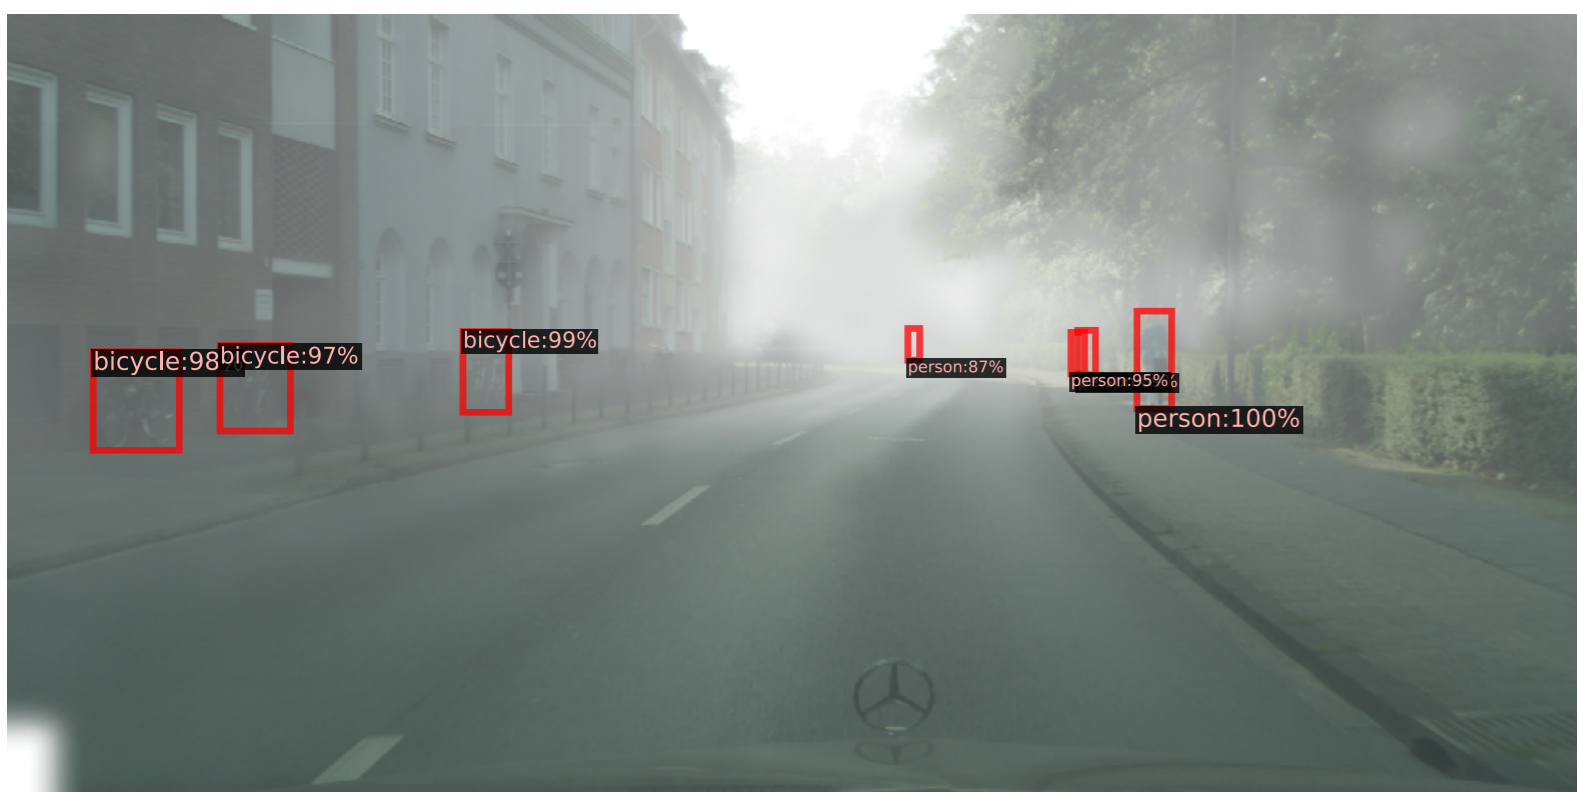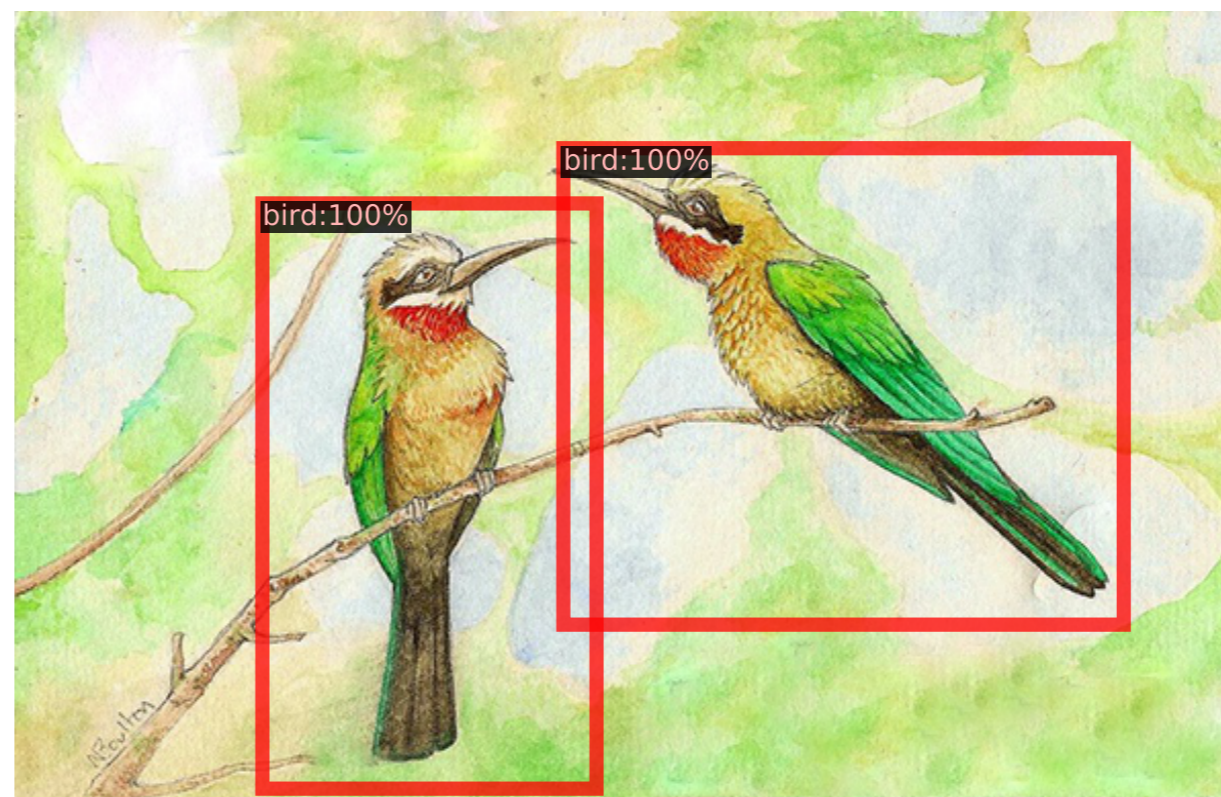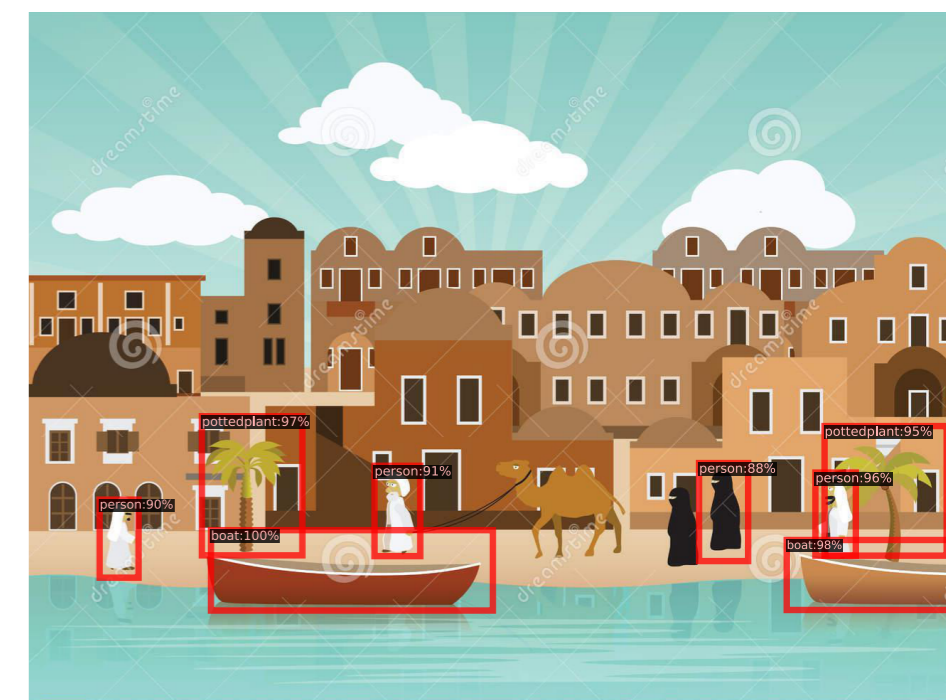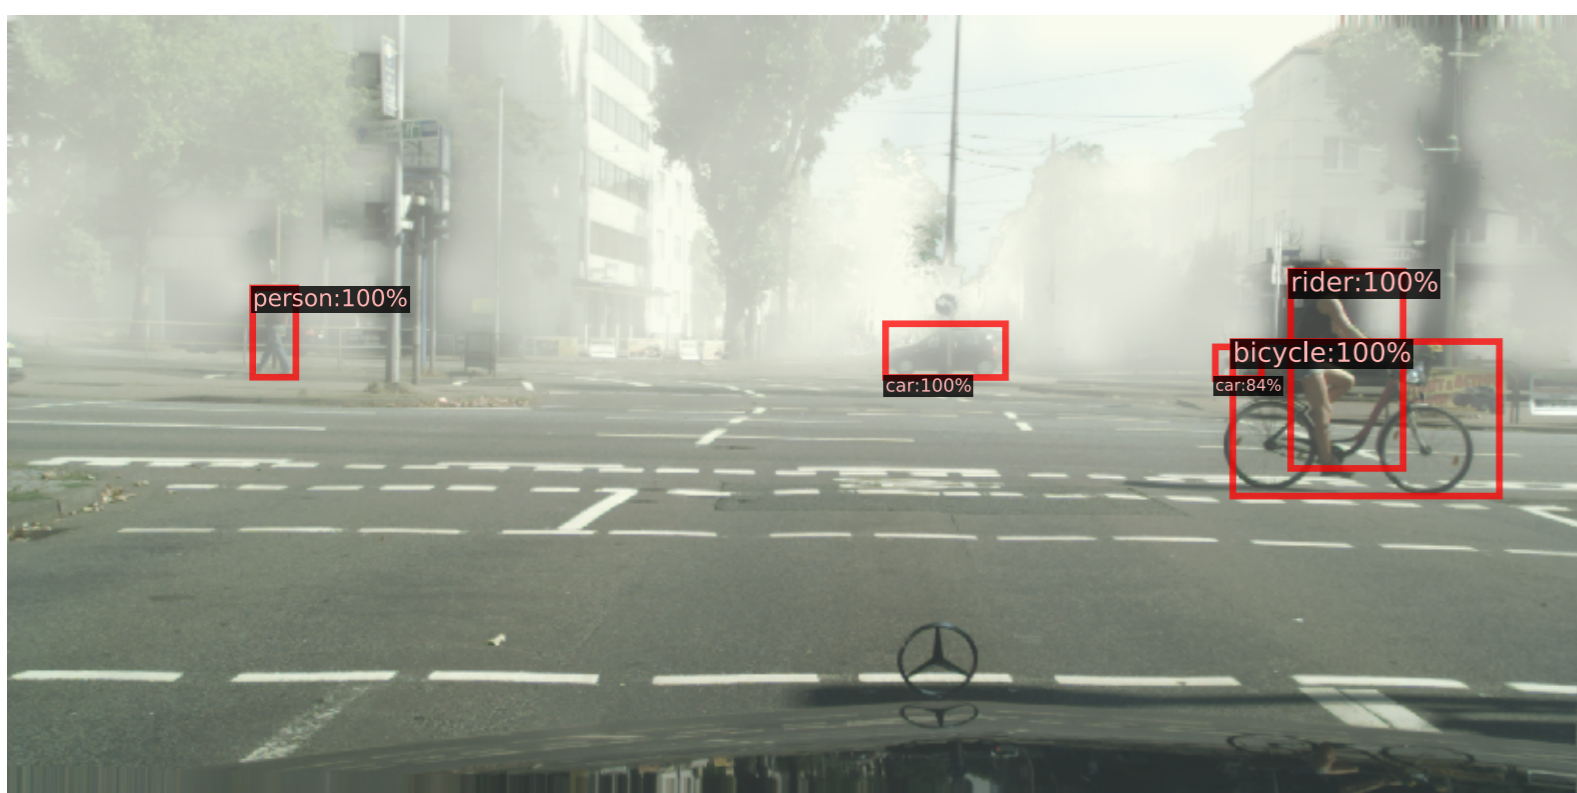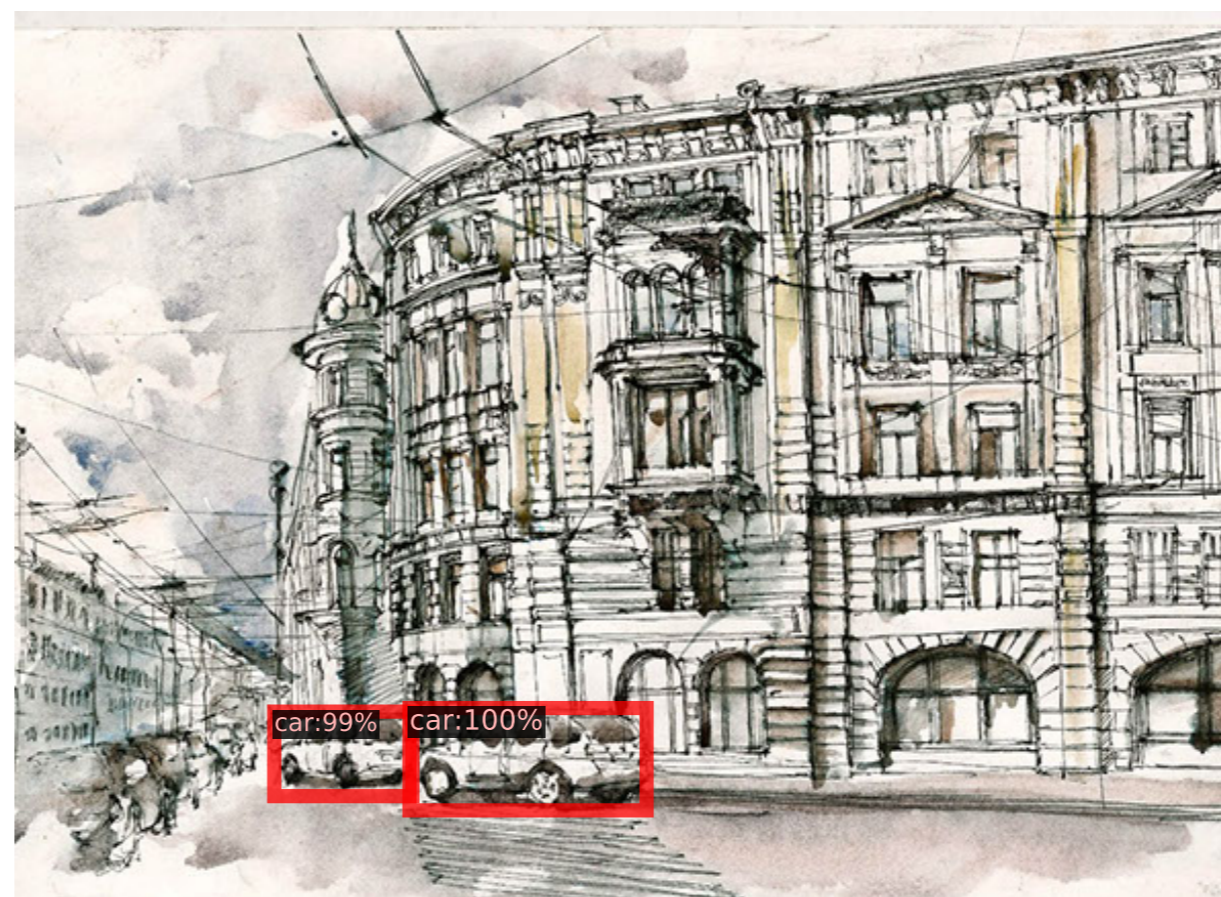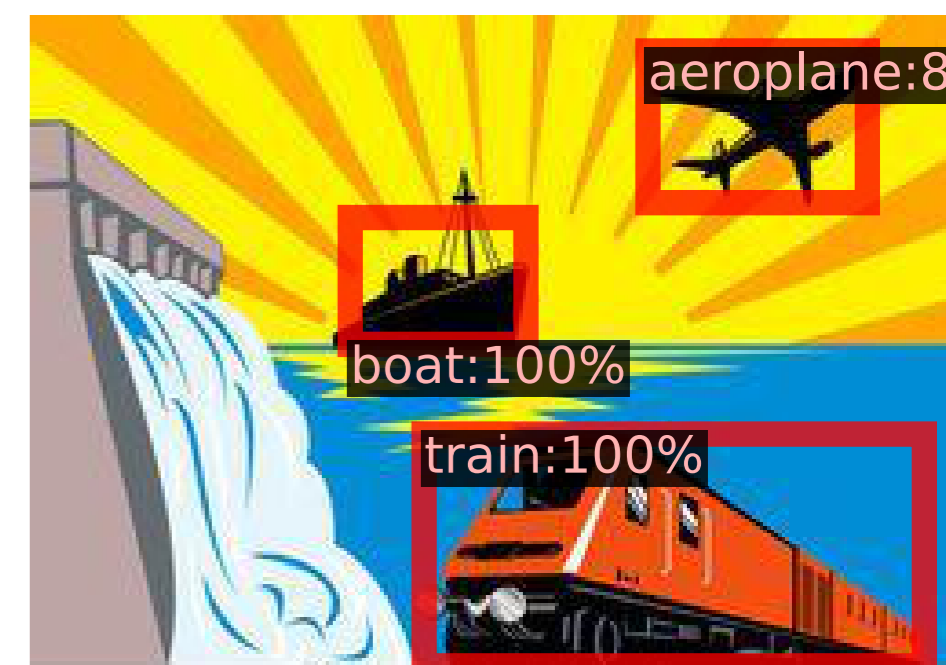

Supplement: Supplementary file 3 [file 123580477-supp.zip › detection_results.pdf]

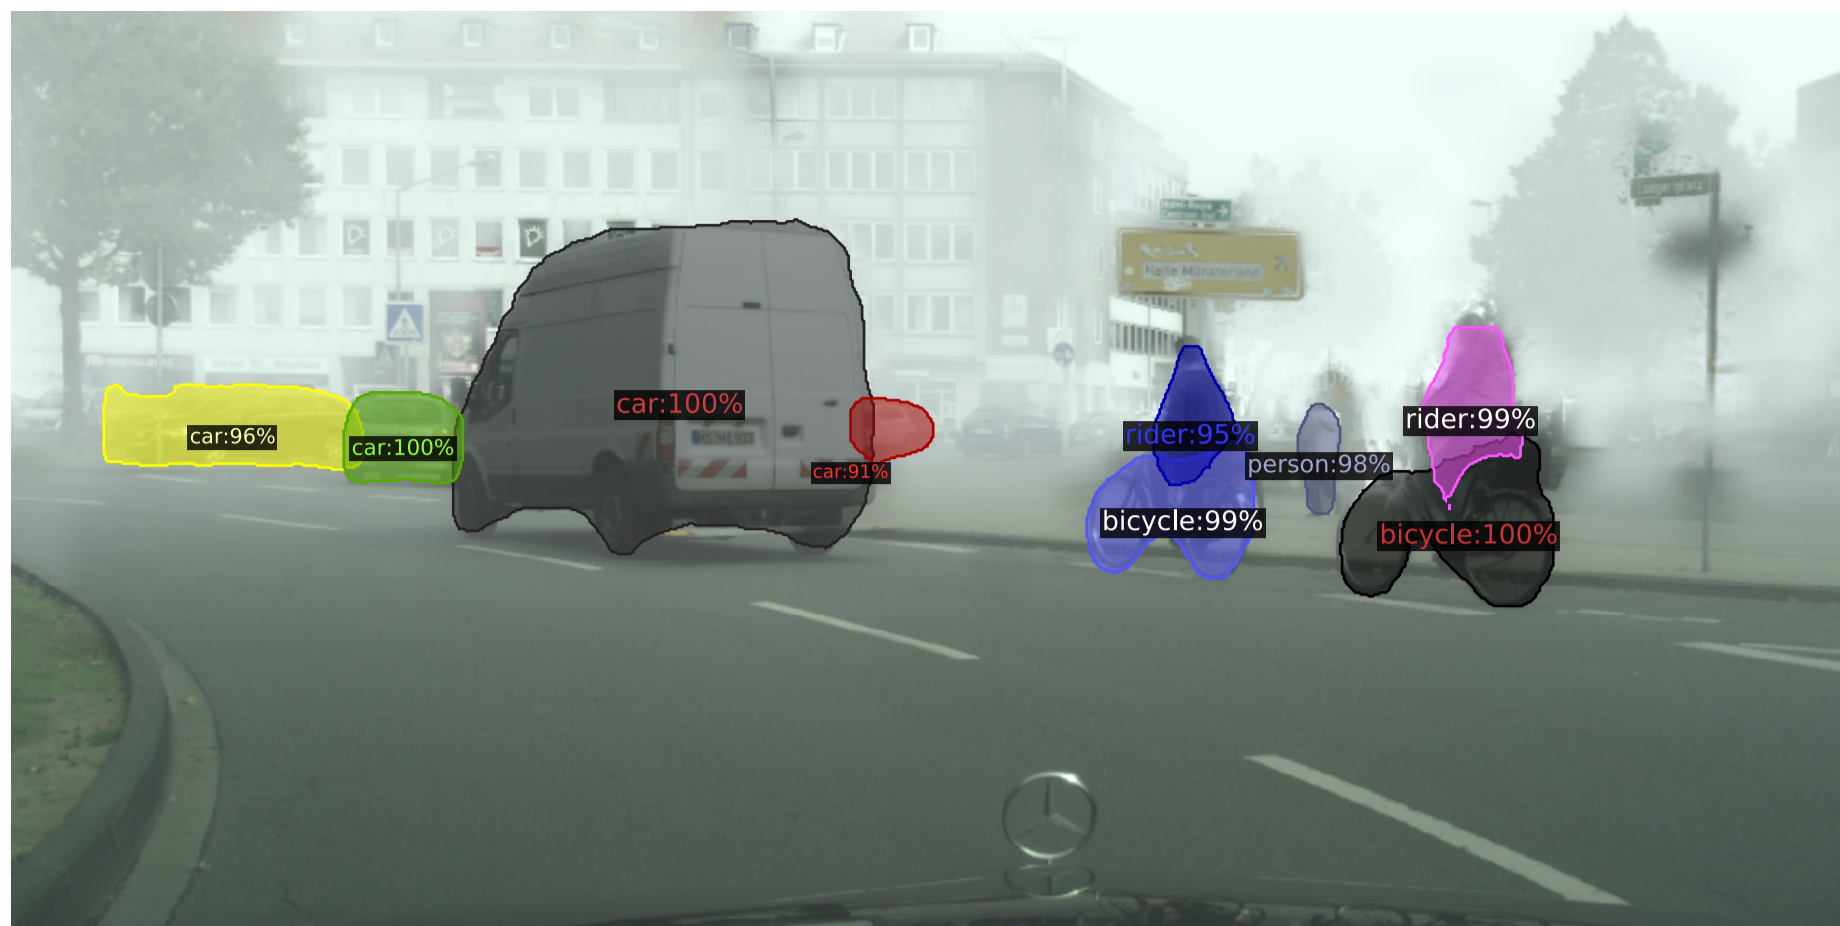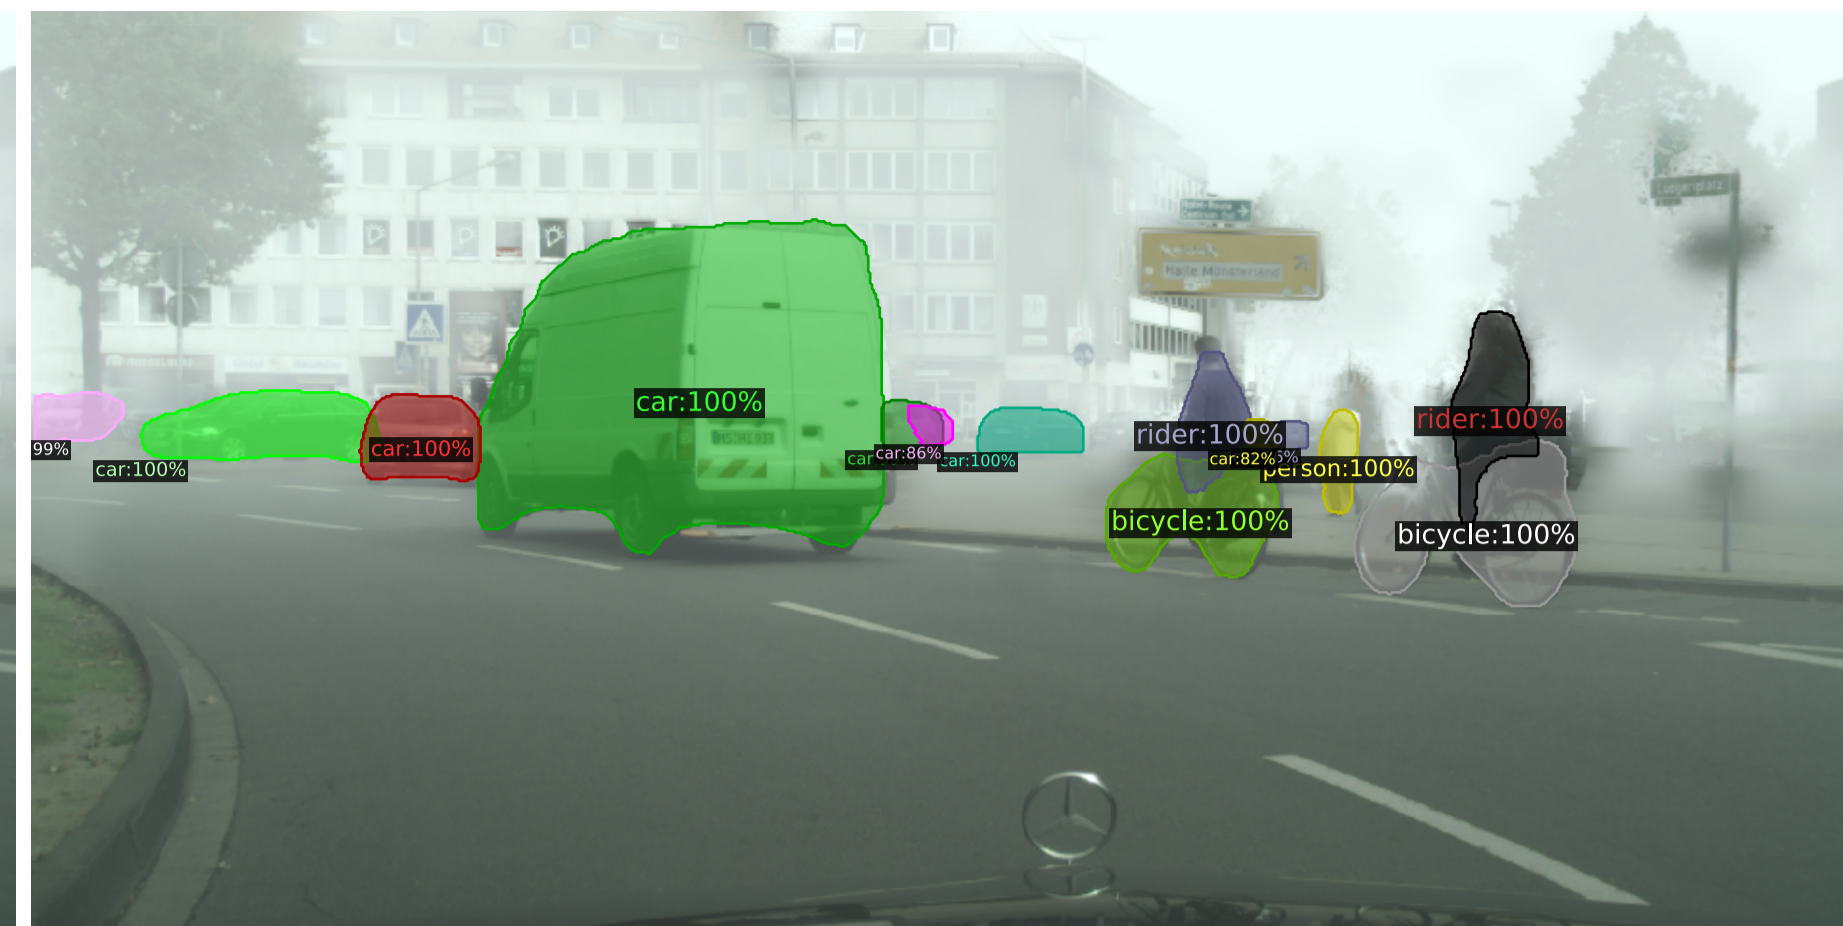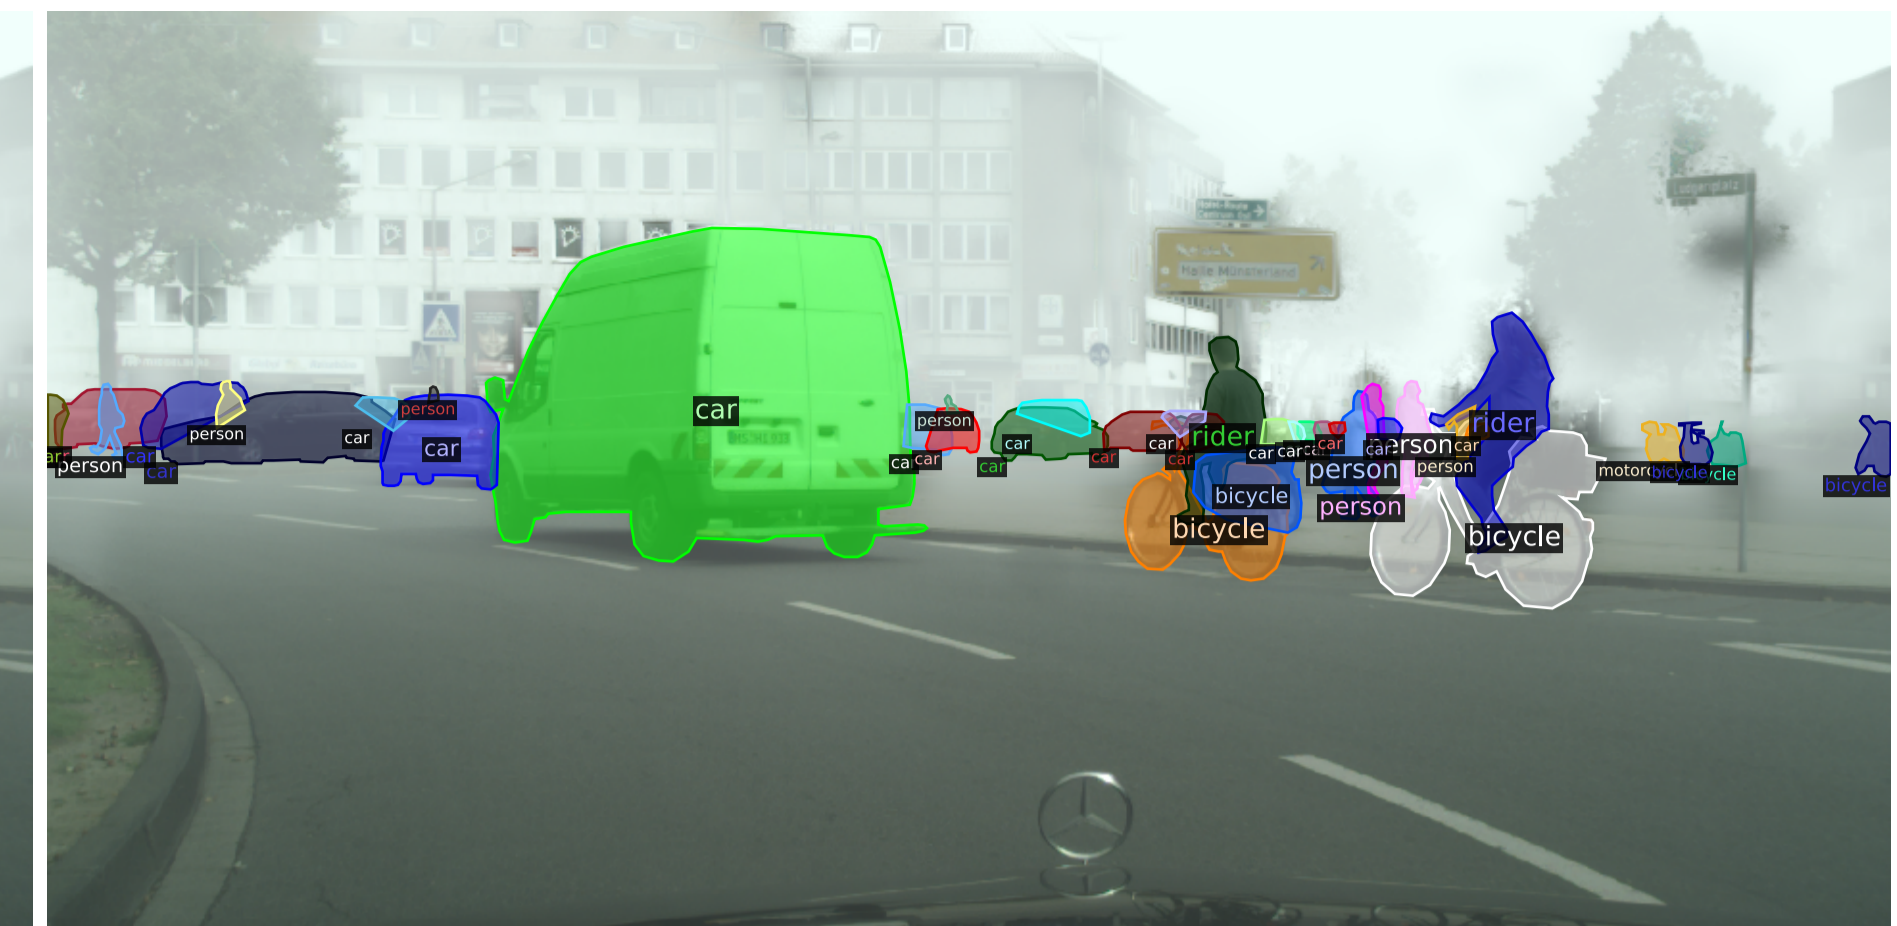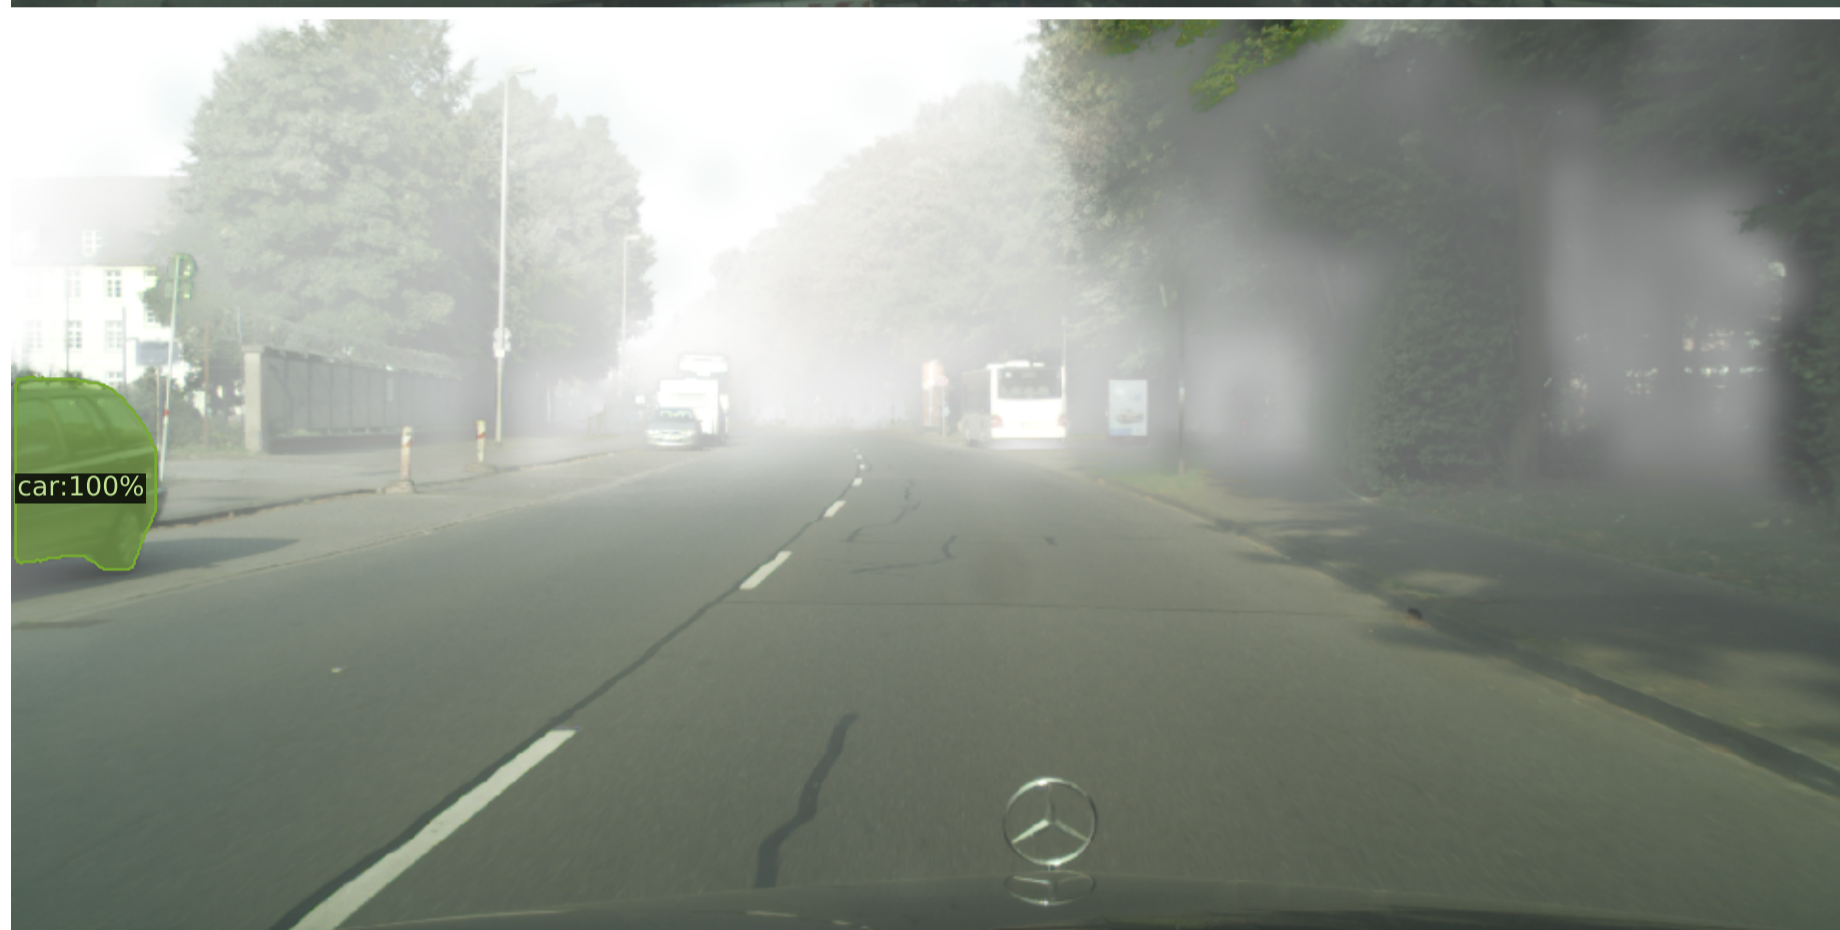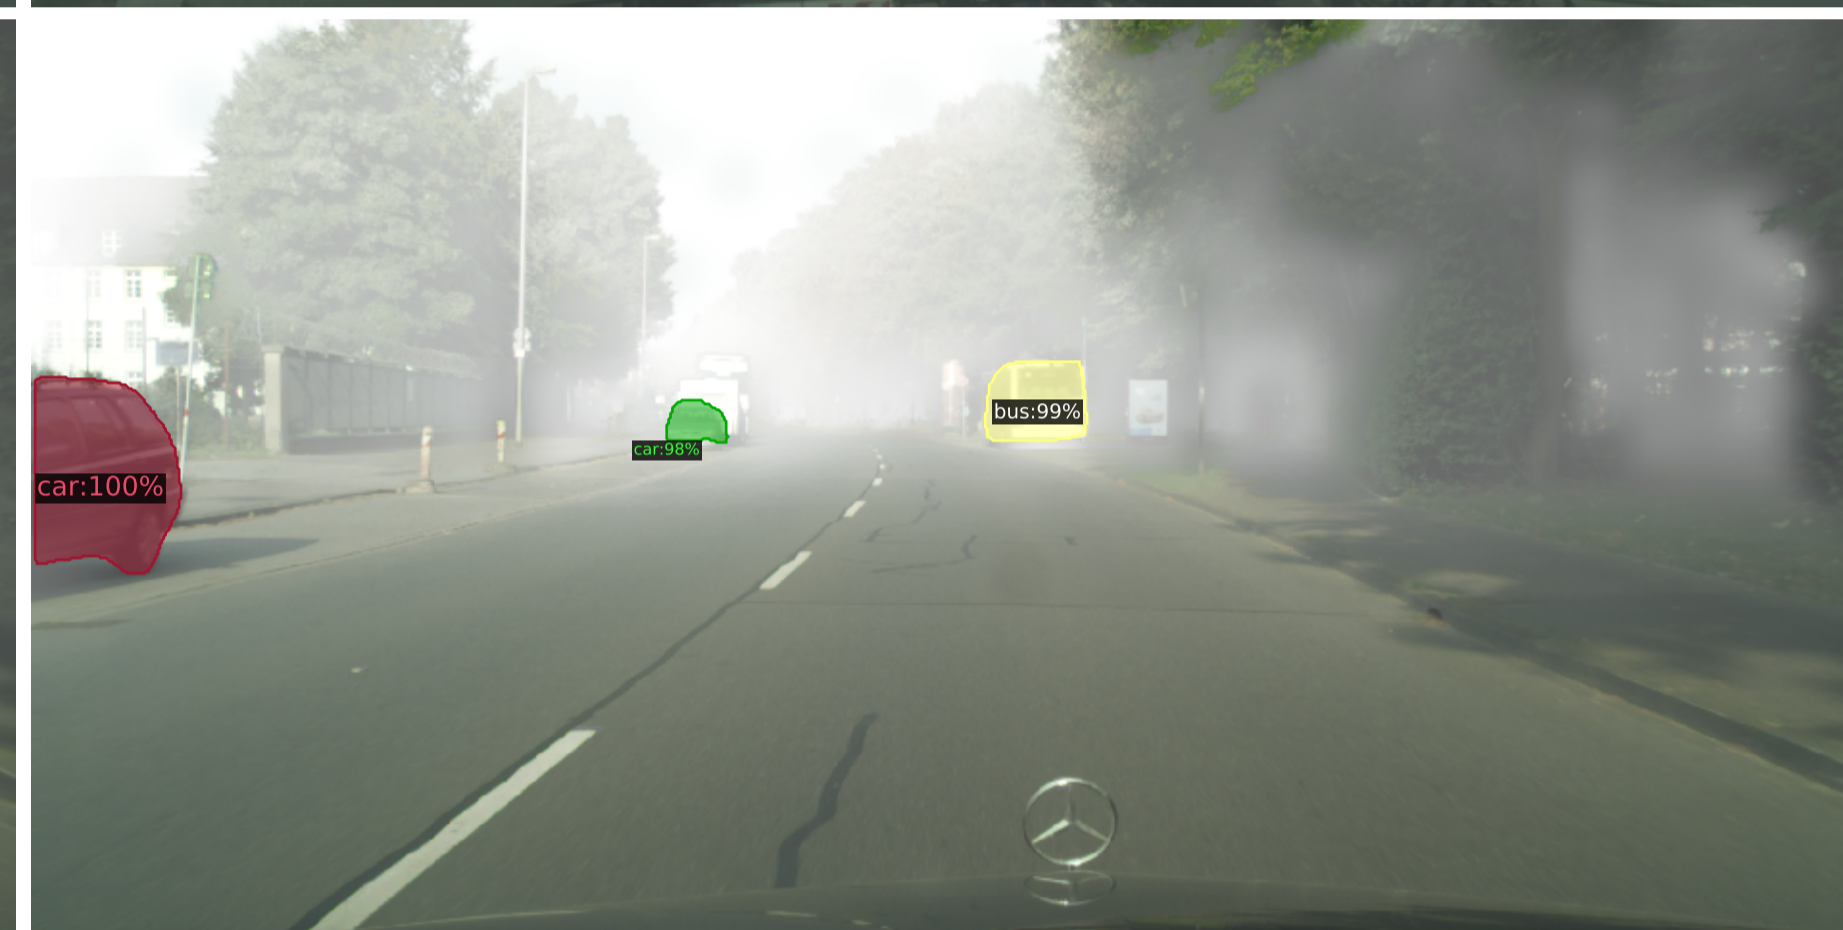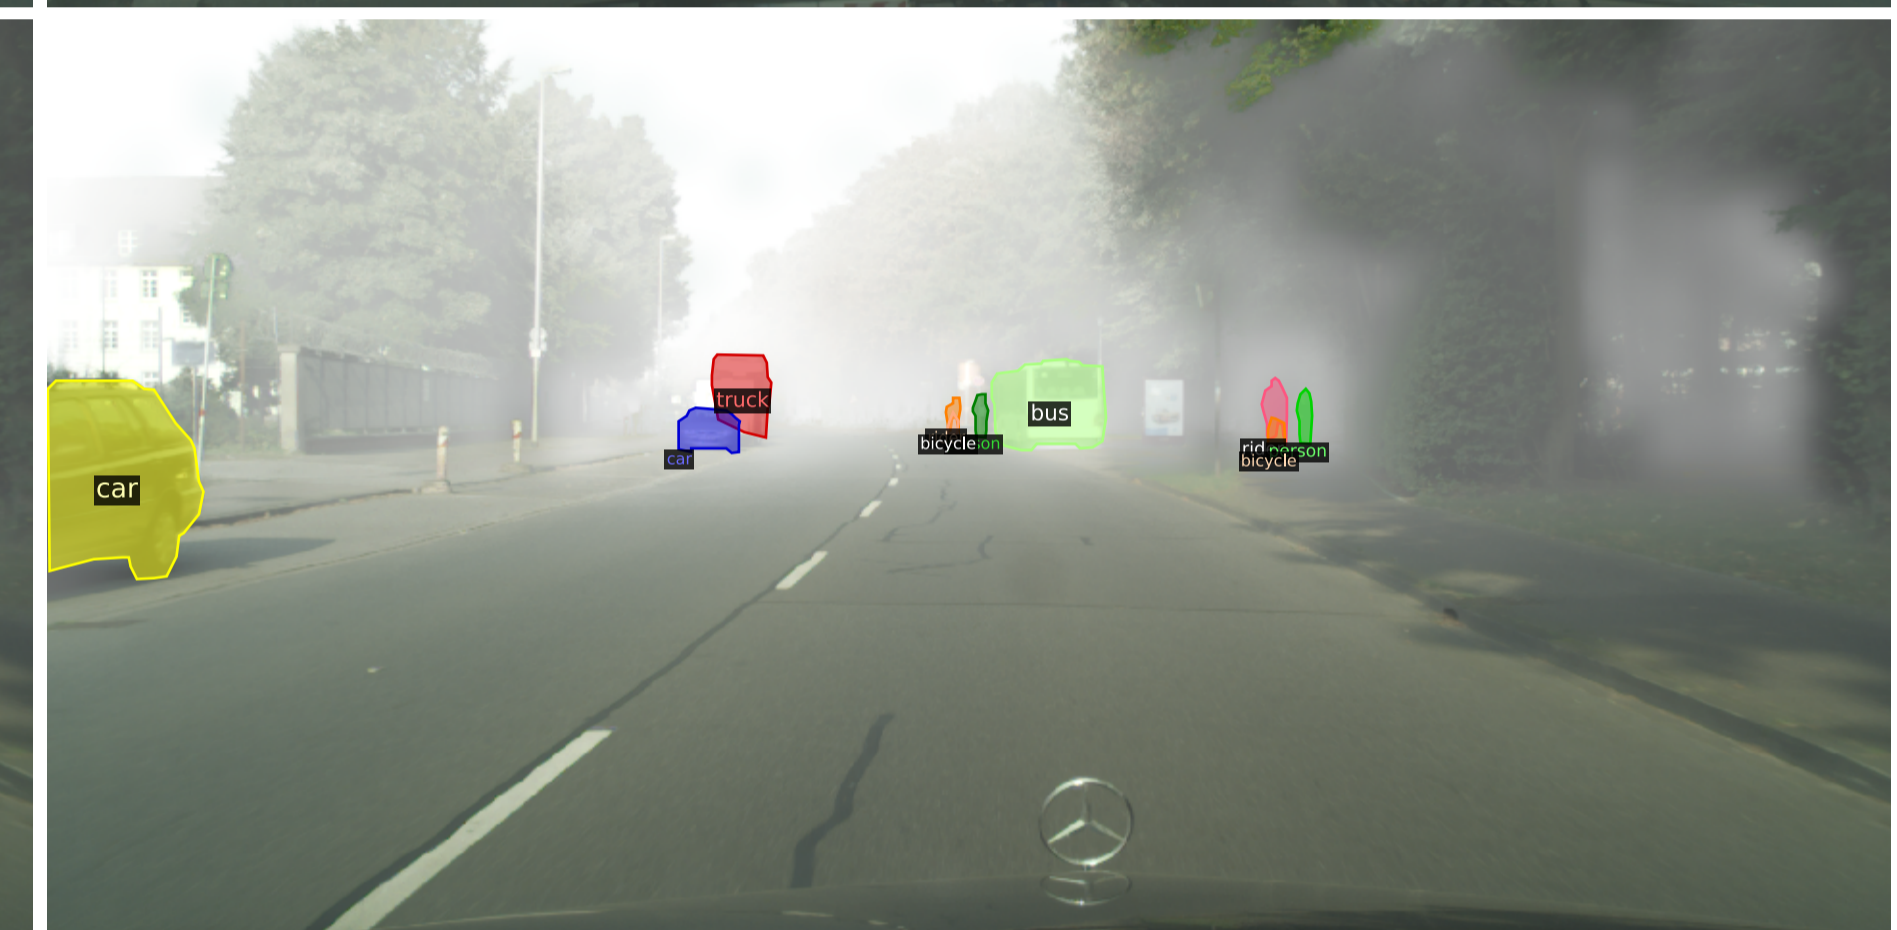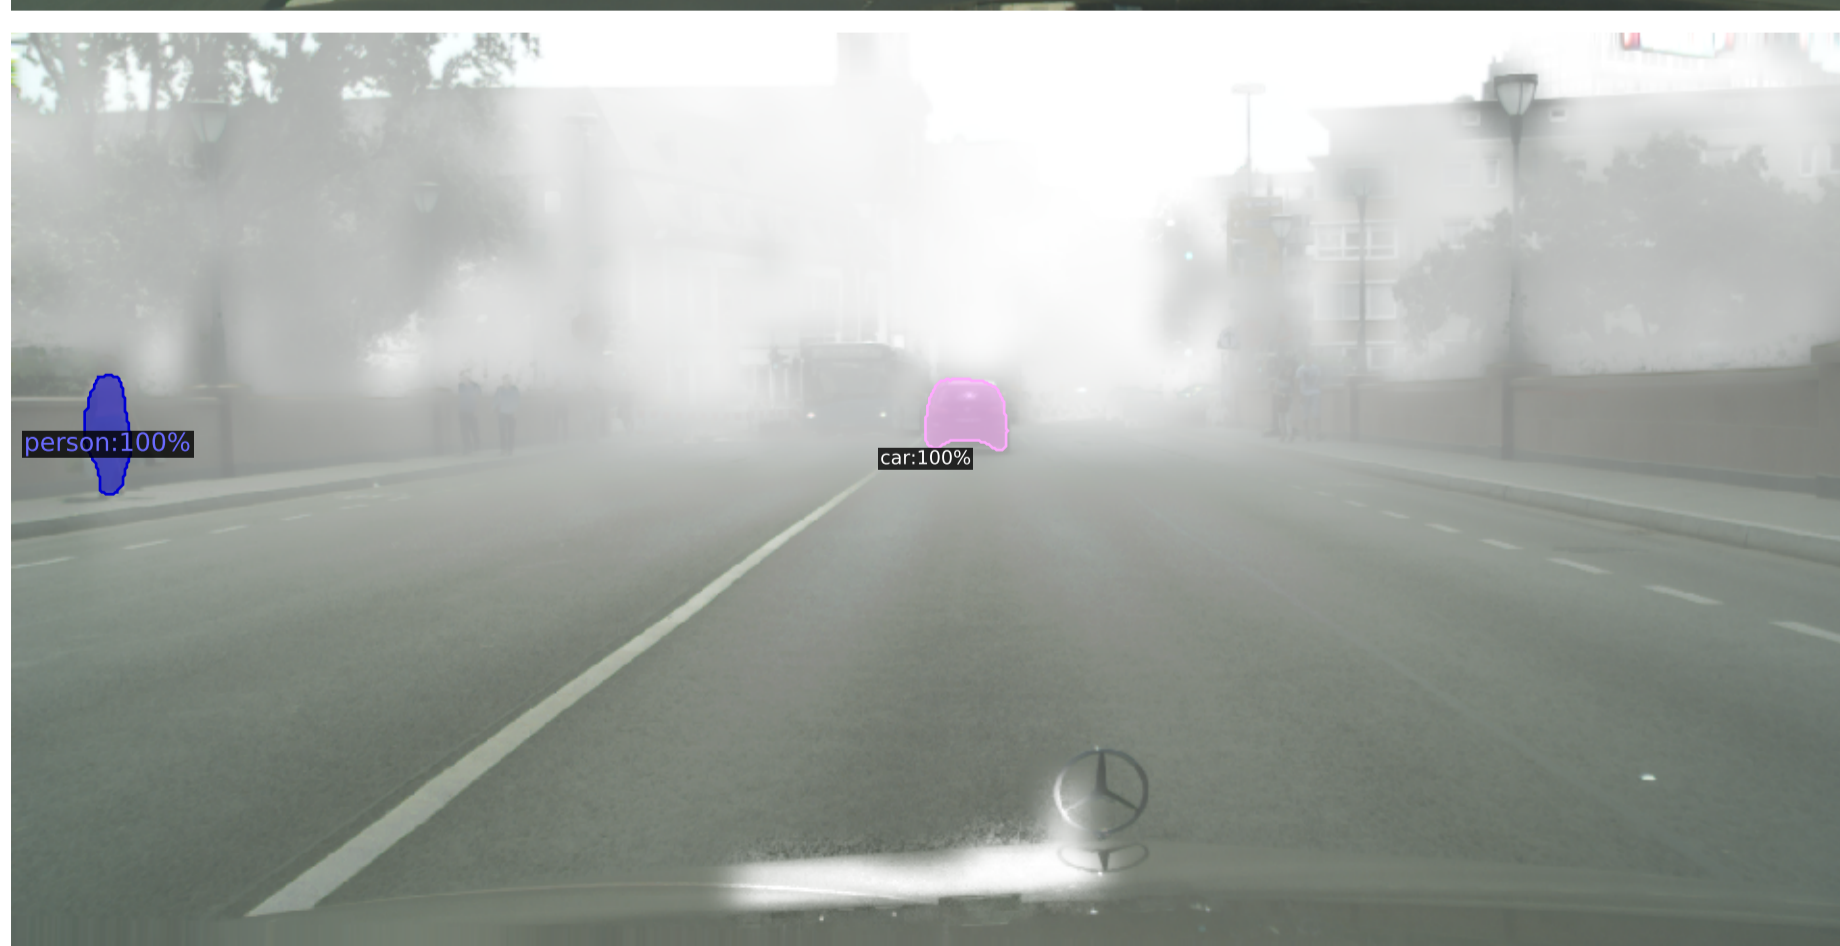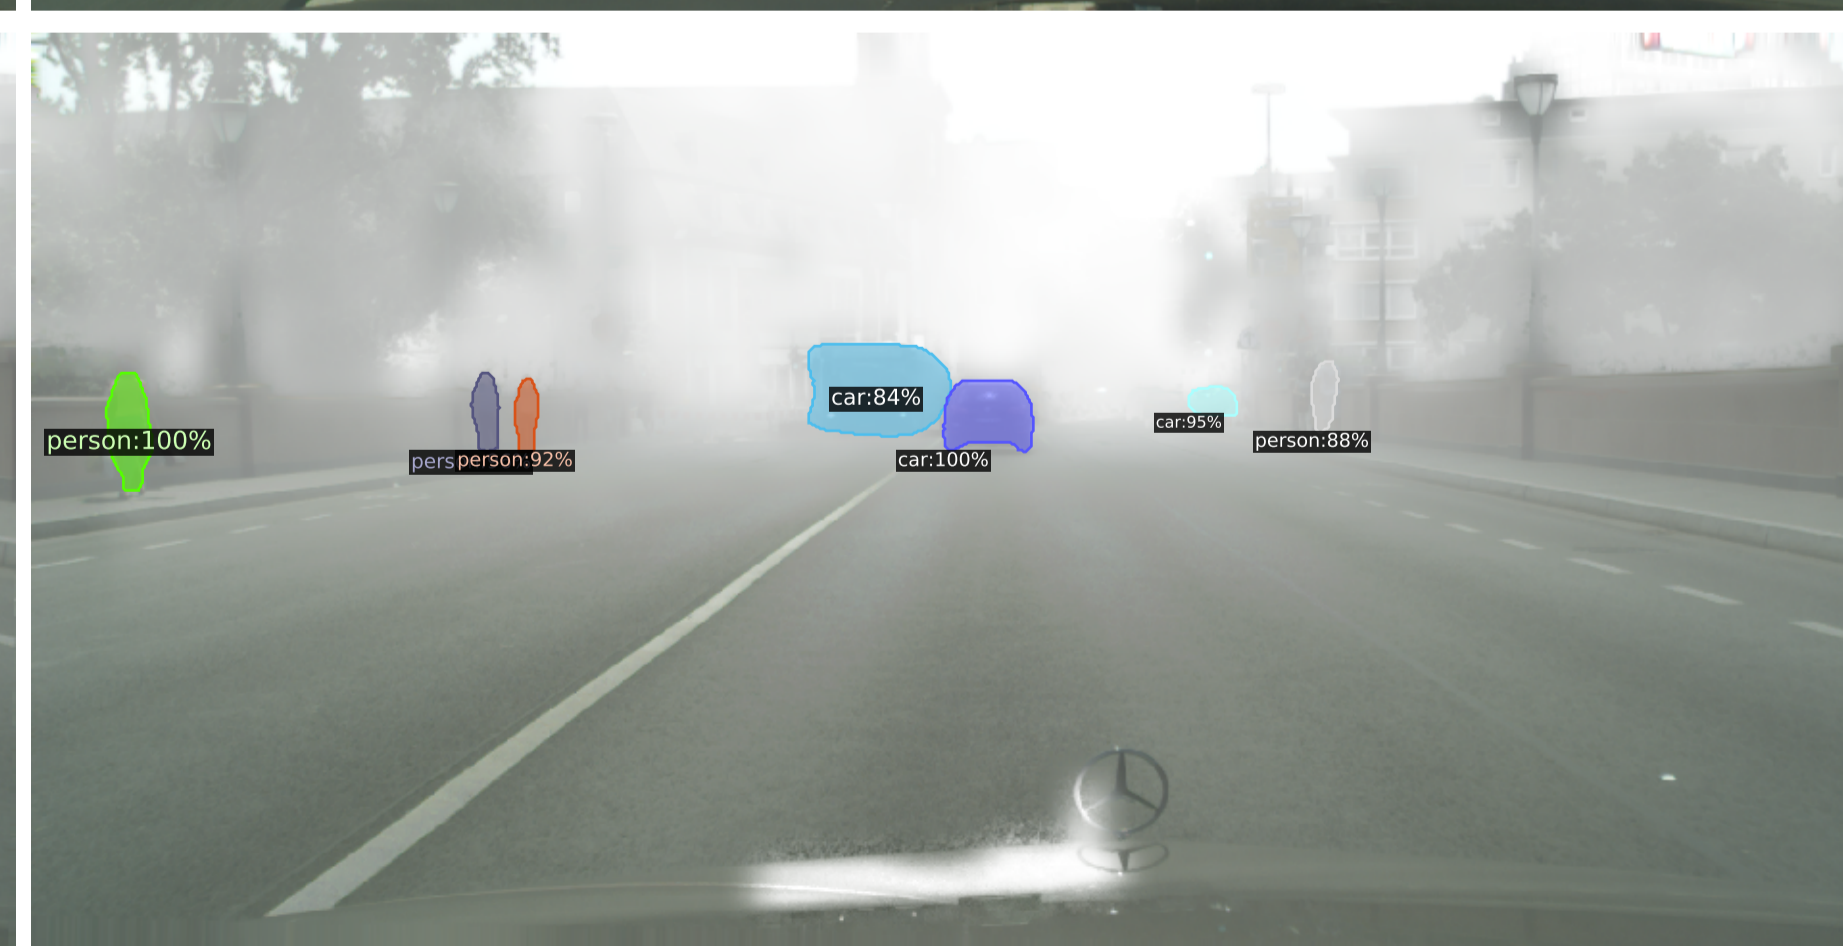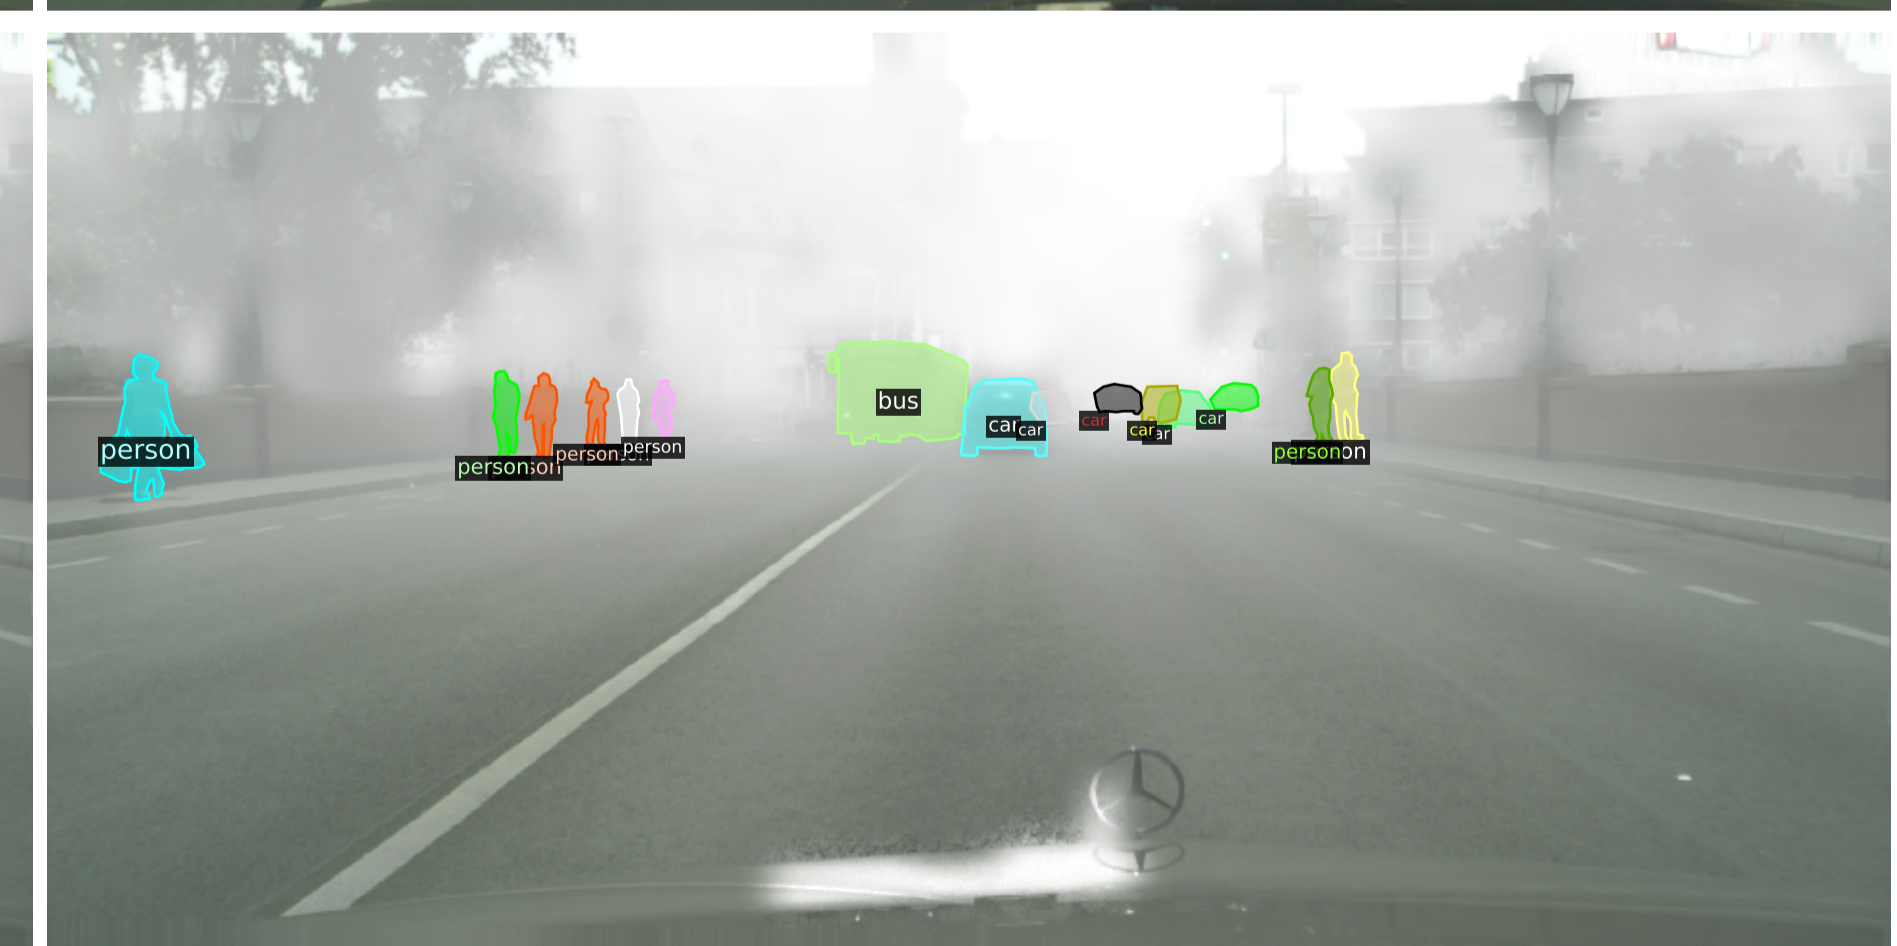

Non-adapted

Adapted (Ours)

Ground-Truth

Supplement: Supplementary file 3 [file 123580477-supp.zip › instance_seg_results.pdf]
